# Supplementary material
Source: PubMed Central journal article supplement (PMC6682811)
Supplement: CJN.01740219SupplementaryData.pdf [file CJN.01740219SupplementaryData.pdf]

## **Supplemental Materials**

### **Urinary Melamine Levels and Progression of Chronic Kidney Disease**

Yi-Chun Tsai, Chia-Fang Wu, Chia-Chu Liu, Tusty-Juan Hsieh, Yu-Ting Lin,  
Yi-Wen Chiu, Shang-Jyn Hwang, Hung-Chun Chen, Ming-Tsang Wu

### **Supplemental method** – urinary melamine measurement

Briefly, the elute of 1 ml urine sample collected in an Oasis MCX SPE cartridge (Waters, Malford, MA) was dried using nitrogen gas. The residues were reconstituted in 200 ml mobile phase and analyzed LC-MS/MS. The MDL in urine was 0.4 ng/ml. Urinary creatinine was analyzed by spectrophotometer (U-2000; Hitachi, Tokyo, Japan) set at a wavelength of 520 nm to measure the creatinine–picrate reaction.

## **Supplemental Tables**

Supplemental Table 1. The clinical characteristics of CKD subjects of eGFR  $\geq 30$  ml/min/1.73m<sup>2</sup> with or without baseline urinary melamine levels.

Supplemental Table 2. The Spearman correlation between urinary corrected melamine levels and some clinical data related to kidney outcomes in study subjects.

Supplemental Table 3. Distribution of cancer or other causes of death during follow up by tertiles of urinary corrected melamine levels.

Supplemental Table 4. Relationship of urinary corrected melamine levels with different kidney outcomes in subjects entering doubling of creatinine levels after 2 years of enrollment

Supplemental Table 5. Relationship of urinary uncorrected melamine levels and different kidney outcomes adjusting for other covariates plus urinary creatinine levels.

Supplemental Table 6. Relationship of urinary corrected melamine levels with different kidney outcomes by using the method of covariate-adjusted standardization plus creatinine adjustment.

Supplemental Table 7. Comparison of demographic characteristics and laboratory data between patients with calcium urolithiasis and one cohort of occupational setting with melamine tableware manufacturing workers (melamine workers) and healthy controls

in our earlier study.

Supplemental Table 1. The clinical characteristics of CKD subjects of eGFR  $\geq 30$  ml/min/1.73m<sup>2</sup> with or without baseline urinary melamine levels.

|                                      | <b>Entire Cohort</b> | <b>Measured urinary melamine</b>                          |                                                                                    | <b>Unmeasured urinary melamine</b>                        |                                                                                    |
|--------------------------------------|----------------------|-----------------------------------------------------------|------------------------------------------------------------------------------------|-----------------------------------------------------------|------------------------------------------------------------------------------------|
| <b>N</b>                             | 742                  | 293                                                       |                                                                                    | 449                                                       |                                                                                    |
| Age (yrs)                            | 62 $\pm$ 16          | 57 $\pm$ 14                                               |                                                                                    | 65 $\pm$ 16                                               |                                                                                    |
| Sex (male, %)                        | 526 (71)             | 159 (54)                                                  |                                                                                    | 367 (82)                                                  |                                                                                    |
| eGFR<br>(ml/min/1.73m <sup>2</sup> ) | 56 $\pm$ 25          | 59 $\pm$ 29                                               |                                                                                    | 53 $\pm$ 21                                               |                                                                                    |
|                                      | <b>Entire Cohort</b> | <b>eGFR <math>\geq 60</math> ml/min/1.73m<sup>2</sup></b> | <b>eGFR <math>\geq 30</math> and <math>&lt; 60</math> ml/min/1.73m<sup>2</sup></b> | <b>eGFR <math>\geq 60</math> ml/min/1.73m<sup>2</sup></b> | <b>eGFR <math>\geq 30</math> and <math>&lt; 60</math> ml/min/1.73m<sup>2</sup></b> |
| <b>N</b>                             | 742                  | 115                                                       | 178                                                                                | 119                                                       | 330                                                                                |
| Sex (male, %)                        | 526 (71)             | 66 (57)                                                   | 93 (52)                                                                            | 83(70)                                                    | 287(87)                                                                            |
| Age (n, %)                           |                      |                                                           |                                                                                    |                                                           |                                                                                    |
| $\leq 50$ yrs                        | 135(18)              | 36 (31)                                                   | 43 (24)                                                                            | 34(29)                                                    | 23(7)                                                                              |
| $>50\leq 70$ yrs                     | 364(49)              | 65 (57)                                                   | 100 (56)                                                                           | 62(52)                                                    | 136(41)                                                                            |
| $>70$ yrs                            | 243(33)              | 14 (12)                                                   | 35 (20)                                                                            | 23(19)                                                    | 171(52)                                                                            |

Supplemental Table 2. The Spearman correlation between urinary corrected melamine levels and clinical data related to renal outcomes in study subjects.

|              | <b>Baseline eGFR,<br/>ml/min/1.73m<sup>2</sup></b> | <b>UPCR,<br/>g/g</b> | <b>Albumin, g/dl</b> | <b>Uric acid,<br/>mg/dl</b> | <b>Hemoglobin,<br/>g/dl</b> |
|--------------|----------------------------------------------------|----------------------|----------------------|-----------------------------|-----------------------------|
| Spearman's r | -0.32                                              | 0.15                 | -0.19                | 0.12                        | -0.26                       |
| P-value      | <0.001                                             | 0.015                | 0.001                | 0.041                       | <0.001                      |

Abbreviations: eGFR: estimated glomerular filtration rate; UPCR: urinary protein/creatinine ratio.

Supplemental Table 3. Distribution of cancer or other causes of death during follow up by tertiles of urinary corrected melamine levels

| N                                       | Urinary corrected melamine levels |                 |                 |                 |
|-----------------------------------------|-----------------------------------|-----------------|-----------------|-----------------|
|                                         | Entire cohort<br>293              | Tertile 1<br>98 | Tertile 2<br>97 | Tertile 3<br>98 |
|                                         | N (%)                             |                 |                 |                 |
| <b>Cancer or other causes of deaths</b> | 8(2.7)                            | 1(1.0)          | 5(5.2)          | 2(2.0)          |

<sup>a</sup>Fisher's exact test.

Three tertiles of urinary corrected melamine levels ( $\mu\text{g}/\text{mmol}$ ): 0.02-0.58, 0.59-1.46, and 1.47-12.7 with cut-offs of at 0.58 and 1.46  $\mu\text{g}/\text{mmol}$ .

Supplemental Table 4. Relationship of urinary corrected melamine levels with different renal outcomes in subjects entering doubling of creatinine levels after 2 years of enrollment

| <b>Log<sub>10</sub>-transformed urinary corrected melamine levels</b> | <b>Adjusted HR<sup>a</sup><br/>(95% CI)</b> |
|-----------------------------------------------------------------------|---------------------------------------------|
| <b>Doubling of serum creatinine levels</b>                            | 1.82(1.07-3.10)                             |
|                                                                       | <b>Adjusted OR<sup>a</sup><br/>(95% CI)</b> |
| <b>eGFR decline &gt; 3 ml/min/1.73 m<sup>2</sup> per year</b>         | 2.00(1.11-3.62)                             |
| <b>30% decrease of eGFR in the first two years</b>                    | 2.96(1.38-6.33)                             |

Abbreviations: CI: confidence interval; eGFR: estimated glomerular filtration rate; HR: hazard ratio; OR: odds ratio.

<sup>a</sup>Adjusting for age, sex, body mass index, angiotensin converting enzyme inhibitor/angiotensin II receptor blocker usage, diabetes mellitus, hypertension, eGFR and UPCR (urinary protein/creatinine ratio) cut at 1 g/g.



Supplemental Table 5. Relationship of urinary uncorrected melamine levels and different renal outcomes adjusting for other covariates plus urinary creatinine levels

|                                                        | <b>Doubling of serum creatinine levels</b> | <b>eGFR decline &gt; 3 ml/min/1.73 m<sup>2</sup> per year</b> | <b>30% decline in eGFR in the first two years</b> |
|--------------------------------------------------------|--------------------------------------------|---------------------------------------------------------------|---------------------------------------------------|
|                                                        | HR (95% CI)                                | OR (95% CI)                                                   | OR (95% CI)                                       |
| <b>Crude analyses</b>                                  |                                            |                                                               |                                                   |
| Log <sub>10</sub> -transformed urinary melamine levels | 2.00 (1.25-3.19)                           | 1.93 (1.15-3.24)                                              | 2.41 (1.28-4.54)                                  |
| By tertiles <sup>a</sup>                               |                                            |                                                               |                                                   |
| Tertile 1                                              | Reference                                  | Reference                                                     | Reference                                         |
| Tertile 2                                              | 1.87 (1.06-3.32)                           | 1.72 (0.94-3.14)                                              | 2.01 (0.94-4.28)                                  |
| Tertile 3                                              | 2.03 (1.13-3.66)                           | 1.78 (0.97-3.27)                                              | 2.65 (1.24-5.67)                                  |
| <b>Adjusted analyses<sup>b</sup></b>                   |                                            |                                                               |                                                   |
| Log <sub>10</sub> -transformed urinary melamine levels | 1.81 (1.03-3.16)                           | 2.03 (1.13-3.65)                                              | 2.49 (1.21-5.11)                                  |
| By tertiles <sup>a</sup>                               |                                            |                                                               |                                                   |
| Tertile 1                                              | Reference                                  | Reference                                                     | Reference                                         |
| Tertile 2                                              | 1.86 (1.01-3.43)                           | 1.82 (0.94-3.53)                                              | 1.92 (0.85-4.32)                                  |
| Tertile 3                                              | 1.89 (1.04-3.42)                           | 1.81 (0.92-3.54)                                              | 2.52 (1.11-5.70)                                  |

Abbreviations: CI: confidence interval; eGFR: estimated glomerular filtration rate; HR: hazard ratio; OR: odds ratio

<sup>a</sup>Urinary uncorrected melamine level (ng/ml) cut at 4.36 and 10.60.

<sup>b</sup>Adjusting for age, sex, body mass index, angiotensin converting enzyme inhibitor/angiotensin II receptor blocker usage, diabetes mellitus, hypertension, baseline estimated glomerular filtration rate, urinary protein/creatinine ratio cut at 1 g/g, and log-transformed urinary creatinine levels.

Three tertiles of urinary corrected melamine levels (µg/mmol): 0.02-0.58, 0.59-1.46, and 1.47-12.7 with cut-offs of at 0.58 and 1.46 µg/mmol.

Supplemental Table 6. Relationship of urinary corrected melamine levels with different renal outcomes by using the method of covariate-adjusted standardization

|                                                | <b>Doubling of serum creatinine levels</b> | <b>eGFR decline &gt; 3 ml/min/1.73 m<sup>2</sup> per year</b> | <b>30% decline in eGFR in the first two years</b> |
|------------------------------------------------|--------------------------------------------|---------------------------------------------------------------|---------------------------------------------------|
|                                                | HR (95% CI)                                | OR (95% CI)                                                   | OR (95% CI)                                       |
| <b>Crude analyses</b>                          |                                            |                                                               |                                                   |
| Log <sub>10</sub> -transformed melamine levels | 2.09 (1.33-3.29)                           | 2.05 (1.25-3.39)                                              | 2.60 (1.41-4.80)                                  |
| By tertiles <sup>a</sup>                       |                                            |                                                               |                                                   |
| Tertile 1                                      | Reference                                  | Reference                                                     | Reference                                         |
| Tertile 2                                      | 1.68 (0.91-3.13)                           | 1.72 (0.94-3.14)                                              | 1.26 (0.57-2.79)                                  |
| Tertile 3                                      | 2.66 (1.50-4.72)                           | 2.09 (1.15-3.79)                                              | 3.15 (1.53-6.45)                                  |
| <b>Adjusted analyses<sup>b</sup></b>           |                                            |                                                               |                                                   |
| Log <sub>10</sub> -transformed melamine levels | 1.77 (1.06-2.97)                           | 2.07 (1.17-3.64)                                              | 2.64 (1.32-5.27)                                  |
| By tertiles <sup>a</sup>                       |                                            |                                                               |                                                   |
| Tertile 1                                      | Reference                                  | Reference                                                     | Reference                                         |
| Tertile 2                                      | 1.58 (0.83-3.01)                           | 1.75 (0.90-3.41)                                              | 1.10 (0.47-2.59)                                  |
| Tertile 3                                      | 2.08 (1.13-3.84)                           | 2.05 (1.04-4.03)                                              | 3.03 (1.37-6.74)                                  |

Abbreviations: CI: confidence interval; eGFR: estimated glomerular filtration rate; HR: hazard ratio; OR: odds ratio

<sup>a</sup>Predicted urinary melamine levels (µg/mmol creatinine) 0.58 and 1.53.

<sup>b</sup>Adjusting for age, sex, body mass index, angiotensin converting enzyme inhibitor/angiotensin II receptor blocker usage, diabetes mellitus, hypertension, baseline estimated glomerular filtration rate, and urinary protein/creatinine ratio cut at 1 g/g.

Three tertiles of urinary corrected melamine levels (µg/mmol): 0.02-0.58, 0.59-1.46, and 1.47-12.7 with cut-offs of at 0.58 and 1.46 µg/mmol.

Supplemental Table 7. Comparison of demographic characteristics and laboratory data between patients with calcium urolithiasis and one cohort of occupational setting with melamine tableware manufacturing workers (melamine workers) and healthy controls in our earlier study.

| Variables                    | Early CKD patients<br>(This study) | Patients with calcium <sup>a</sup><br>urolithiasis | Healthy controls <sup>b</sup> | Melamine workers <sup>b</sup>     |
|------------------------------|------------------------------------|----------------------------------------------------|-------------------------------|-----------------------------------|
| N                            | 293                                | 309                                                | 105                           | 44                                |
|                              | N (%) or Mean ± SD (median, IQR)   |                                                    |                               |                                   |
| Gender                       |                                    |                                                    |                               |                                   |
| Male                         | 159 (54)                           | 226 (73)                                           | 97 (92)                       | 21 (48)                           |
| Female                       | 134 (46)                           | 83 (27)                                            | 8 (8)                         | 23 (52)                           |
| Age (years)                  | 56.8 ± 14.0 (58.2, 49.7-66.7)      | 54.7 ± 12.8 (55.0, 47.0-63.0)                      | 48.8 ± 9.0 (51.0, 48.0-55.0)  | 42.2 ± 9.0 (43.0, 34.0-50.0)      |
| BMI (kg/m <sup>2</sup> )     | 25.8 ± 4.1 (25.4, 23.1-28.2)       | 26.3 ± 4.1 (25.9, 23.8-28.4)                       | 23.7 ± 2.7 (23.2, 22.0-25.5)  | 23.4 ± 4.7 (22.8, 20.7-25.0)      |
| Urinary melamine levels      |                                    |                                                    |                               |                                   |
| Without correction (ng/ml)   | 11.63 ± 14.98 (7.05, 3.34-13.94)   | 12.30 ± 29.20 (4.86, 1.93-12.54)                   | 8.1 ± 9.1 (4.3, 1.6-11.2)     | 456.0 ± 507.0 (269.6, 50.3-725.2) |
| With correction (µg/mmol Cr) | 1.7 ± 2.1 (0.97, 0.43-2.08)        | 3.24 ± 6.66 (1.26, 0.48-3.29)                      | 0.7 ± 0.9 (0.3, 0.1-1.0)      | 40.3 ± 45.6 (22.1, 4.3-58.3)      |

<sup>a</sup>Data from Liu CC, Wu CF, Chen BH, Huang SP, Goggins W, Lee HH, et al: Low exposure to melamine increases the risk of urolithiasis in adults *Kidney Int* 80: 746-752, 2011

<sup>b</sup>Wu CF, Peng CY, Liu CC, Lin WY, Pan CH, Cheng CM, et al: Ambient melamine exposure and urinary biomarkers of early renal injury. *J Am Soc Nephrol* 26: 2821-2829, 2015
